# Supplementary material
Source: HighWire-hosted journal article supplement (http://www.jrheum.org/highwire/filestream/36381/field_highwire_adjunct_files/0/181357DataSuppl.pdf)
Supplement: 181357DataSuppl.pdf [file 181357DataSuppl.pdf]

| Clinical Center                                           | Institution Title                                                                                                          | Protocol Number      |
|-----------------------------------------------------------|----------------------------------------------------------------------------------------------------------------------------|----------------------|
| National Jewish Health                                    | National Jewish IRB                                                                                                        | HS-1883a             |
| Brigham and Women's Hospital                              | Partners Human Research Committee                                                                                          | 2007-P-000554/2; BWH |
| Baylor College of Medicine                                | Institutional Review Board for Baylor College of Medicine and Affiliated Hospitals                                         | H-22209              |
| Michael E. DeBakey VAMC                                   | Institutional Review Board for Baylor College of Medicine and Affiliated Hospitals                                         | H-22202              |
| Columbia University Medical Center                        | Columbia University Medical Center IRB                                                                                     | IRB-AAAC9324         |
| Duke University Medical Center                            | The Duke University Health System Institutional Review Board for Clinical Investigations (DUHS IRB)                        | Pro00004464          |
| Johns Hopkins University                                  | Johns Hopkins Medicine Institutional Review Boards (JHM IRB)                                                               | NA_00011524          |
| Los Angeles Biomedical Research Institute                 | The John F. Wolf, MD Human Subjects Committee of Harbor-UCLA Medical Center                                                | 12756-01             |
| Morehouse School of Medicine                              | Morehouse School of Medicine Institutional Review Board                                                                    | 07-1029              |
| Temple University                                         | Temple University Office for Human Subjects Protections Institutional Review Board                                         | 11369                |
| University of Alabama at Birmingham                       | The University of Alabama at Birmingham Institutional Review Board for Human Use                                           | FO70712014           |
| University of California, San Diego                       | University of California, San Diego Human Research Protections Program                                                     | 070876               |
| University of Iowa                                        | The University of Iowa Human Subjects Office                                                                               | 200710717            |
| Ann Arbor VA                                              | VA Ann Arbor Healthcare System IRB                                                                                         | PCC 2008-110732      |
| University of Minnesota                                   | University of Minnesota Research Subjects' Protection Programs (RSPP)                                                      | 0801M24949           |
| University of Pittsburgh                                  | University of Pittsburgh Institutional Review Board                                                                        | PRO07120059          |
| University of Texas Health Sciences Center at San Antonio | UT Health Science Center San Antonio Institutional Review Board                                                            | HSC20070644H         |
| Health Partners Research Foundation                       | Health Partners Research Foundation Institutional Review Board                                                             | 07-127               |
| University of Michigan                                    | Medical School Institutional Review Board (IRBMED)                                                                         | HUM00014973          |
| Minneapolis VA Medical Center                             | Minneapolis VAMC IRB                                                                                                       | 4128-A               |
| Fallon Clinic                                             | Institutional Review Board/Research Review Committee Saint Vincent Hospital – Fallon Clinic – Fallon Community Health Plan | 1143                 |
